# Supplementary material for: Efficient computation of Faith's phylogenetic diversity with applications in characterizing microbiomes
Source: HighWire-hosted journal article supplement (doi:10.1101/gr.275777.121), 2021-09-03
Supplement: Supplemental_Table_S1.xlsx [file Supplemental_Table_S1.xlsx]

## Sheet: Sheet1
Supplemental Table S1. Average memory improvement and speedup of SFPhD compared to the reference implementation.
	Time (s)			Memory (kbytes)
# of Samples	skbio	SFPhD	Speedup (x)	skbio	SFPhD	Improvement (x)
1250	18.6	4.67	3.98	1.00012e+07	312816	31.97
2500	32.8	5.12	6.41	1.91143e+07	313835	60.91
5000	79.75	6.31	12.64	3.67277e+07	315124	116.55
10000	270.34	8.76	30.86	7.58663e+07	317413	239.01
20000	910.62	14.17	64.26	1.52784e+08	320838	476.2
40000	*	25.58	N/A	*	326895	N/A
80000	*	47.26	N/A	*	339670	N/A
* No jobs were able to be completed with the prescribed resources.
